# Supplementary material
Source: PubMed Central journal article supplement (PMC4371975)
Supplement: pnas.201424840SI.pdf [file pnas.201424840SI.pdf]

# Supporting Information

Daloso et al. 10.1073/pnas.1424840112

## SI Materials and Methods

**Isolation of Mitochondria.** For enzyme assays, mitochondria were isolated as described previously (1). Briefly, ~20 g of whole rosette leaves was disrupted with a tissue grinder in 150 mL of cold extraction buffer [0.3 M sucrose, 5 mM tetrasodiumpyrophosphate (10 H<sub>2</sub>O), 2 mM EDTA, 10 mM KH<sub>2</sub>PO<sub>4</sub>, 1% polyvinylpyrrolidone (PVP-40), 1% BSA, 20 mM ascorbic acid, 5 mM Cys (pH 7.5)]. The homogenate was filtered twice through four layers of Miracloth (CalBioChem). The material that was retained was recovered and ground in a cold stone mortar with extraction buffer. This step was repeated three times. The preparation was centrifuged first at 1,100 × *g* for 10 min to separate chloroplast (pellet) and mitochondrial (supernatant) fractions. The supernatant containing the mitochondria-enriched fraction was further centrifuged for 10 min at 18,000 × *g*. The pellet was resuspended in a small volume of washing buffer [0.3 M sucrose, 10 mM 3-(*N*-morpholino)propanesulfonic acid (Mops), 1 mM EGTA (pH 7.2)] and homogenized with a Potter–Elvehjem homogenizer. An additional 15 mL of washing buffer was added, and the mixture was centrifuged again at 1,100 × *g* for 10 min. The supernatant was transferred to new tubes (40 mL), making sure that no pellet was transferred. The suspension was then centrifuged at 18,000 × *g* for 10 min. The obtained pellet was resuspended in 1 mL of washing buffer and loaded on top of a Percoll (GE Healthcare) step gradient. Each gradient consisted of mitochondria gradient buffer [1.5 M sucrose, 50 mM Mops (pH 7.2)] and a 0–4.4% (vol/vol) PVP gradient in 28% (vol/vol) Percoll (1). The gradient loaded with the sample was centrifuged at 40,000 × *g* for 45 min. The bottom part of the gradient containing the mitochondria was collected, washed three times, divided into aliquots, frozen, and stored at –80 °C. The purity of the mitochondria was assessed by determining the activity of marker enzymes phosphoenolpyruvate carboxylase (PEPc, cytosolic), catalase (peroxisome), and cytochrome *c* oxidase (COX, mitochondrial), as well as by measuring the chlorophyll content (2). The protocol for mitochondria isolation leads to a highly concentrated mitochondrial extract, as evidenced by the higher COX activity compared with

whole leaves with low contamination of cytosol, peroxisome, and chloroplast, as evidenced by the activity of the marker enzymes PEPc (cytosolic marker) and catalase (peroxisome marker) and by the chlorophyll content (chloroplastidic marker) (Table S5).

**Enzyme Assays.** Enzymes were extracted as described previously (3), except that Triton X-100 was used at a concentration of 1% and glycerol at 20% (vol/vol). The enzyme assays were performed as follows: ACL (4), NADP-MDH (5), CS and ribulose-1,5-bisphosphate carboxylase oxygenase (Rubisco) (6), PEPc, IDH, FUM, AGPase and NADP-GAPDH (3), NAD-MDH (7), oxoglutarate dehydrogenase (8), ACO (9), SDH (10), SCoAL (11), COX (12), and catalase (13). Activity was expressed by FW or by protein content determined using the method of Bradford (14). For immunoblotting, total leaf protein was extracted as described previously (3). Proteins were separated on a 10% (vol/vol) SDS/PAGE gel and electrotransferred onto a PVDF membrane. Equal loading was validated using Ponceau red staining of the membrane.

**Metabolite Assays.** Leaf samples were taken at end of the day, immediately frozen in liquid nitrogen, and stored at –80 °C until further analysis. Sugars, starch, and nitrate contents were determined as previously described (15). Metabolite extraction for GC-MS was also performed as reported previously (16). Briefly, *Arabidopsis* leaf tissue (~100 mg) was homogenized using a ball-mill precooled with liquid nitrogen and extracted in 1,400 μL of methanol. Sixty microliters of internal standard (0.2 mg of ribitol per milliliter of water) was subsequently added as a quantification standard. The extraction, derivatization, standard addition, and sample injection were exactly as described previously (16). Metabolites were identified by comparison with database entries of authentic standards (17, 18) and are presented in Datasets S2 and S3 following current reporting standards (19). Profiling of secondary metabolites was performed as described previously (20). Obtained data were normalized with the peak area of internal standard (isovitexin). All data were processed using Xcalibur 2.1 software (Thermo Fisher Scientific).

- Meyer EH, et al. (2009) Remodeled respiration in *ndufs4* with low phosphorylation efficiency suppresses *Arabidopsis* germination and growth and alters control of metabolism at night. *Plant Physiol* 151(2):603–619.
- Porra RJ, Thompson WA, Kriedemann PE (1989) Determination of accurate extinction coefficients and simultaneous equations for assaying chlorophylls a and b extracted with four different solvents: Verification of the concentration of chlorophyll standards by atomic absorption spectroscopy. *Biochim Biophys Acta-Bioenergetics* 975(3):384–394.
- Gibon Y, et al. (2004) A Robot-based platform to measure multiple enzyme activities in *Arabidopsis* using a set of cycling assays: Comparison of changes of enzyme activities and transcript levels during diurnal cycles and in prolonged darkness. *Plant Cell* 16(12):3304–3325.
- Fatland BL, et al. (2002) Molecular characterization of a heteromeric ATP-citrate lyase that generates cytosolic acetyl-coenzyme A in *Arabidopsis*. *Plant Physiol* 130(2):740–756.
- Scheibe R, Stitt M (1988) Comparison of NADP-malate dehydrogenase activation QA reduction and O<sub>2</sub> evolution in spinach leaves. *Plant Physiol Biochem* 26:473–481.
- Nunes-Nesi A, et al. (2007) Deficiency of mitochondrial fumarase activity in tomato plants impairs photosynthesis via an effect on stomatal function. *Plant J* 50(6):1093–1106.
- Jenner HL, et al. (2001) NAD malic enzyme and the control of carbohydrate metabolism in potato tubers. *Plant Physiol* 126(3):1139–1149.
- Araújo WL, Nunes-Nesi A, Trenkamp S, Bunik VI, Fernie AR (2008) Inhibition of 2-oxoglutarate dehydrogenase in potato tuber suggests the enzyme is limiting for respiration and confirms its importance in nitrogen assimilation. *Plant Physiol* 148(4):1782–1796.
- Carrari F, et al. (2003) Reduced expression of aconitase results in an enhanced rate of photosynthesis and marked shifts in carbon partitioning in illuminated leaves of wild species tomato. *Plant Physiol* 133(3):1322–1335.
- Araújo WL, et al. (2011) Antisense inhibition of the iron-sulphur subunit of succinate dehydrogenase enhances photosynthesis and growth in tomato via an organic acid-mediated effect on stomatal aperture. *Plant Cell* 23(2):600–627.
- Studart-Guimarães C, et al. (2007) Reduced expression of succinyl-coenzyme A ligase can be compensated for by up-regulation of the  $\gamma$ -aminobutyrate shunt in illuminated tomato leaves. *Plant Physiol* 145(3):626–639.
- Spinazzi M, Casarin A, Pertegato V, Salviati L, Angelini C (2012) Assessment of mitochondrial respiratory chain enzymatic activities on tissues and cultured cells. *Nat Protoc* 7(6):1235–1246.
- Havir EA, McHale NA (1987) Biochemical and developmental characterization of multiple forms of catalase in tobacco leaves. *Plant Physiol* 84(2):450–455.
- Bradford MM (1976) A rapid and sensitive method for the quantitation of microgram quantities of protein utilizing the principle of protein-dye binding. *Anal Biochem* 72(1-2):248–254.
- Sienkiewicz-Porzucek A, et al. (2008) Mild reductions in mitochondrial citrate synthase activity result in a compromised nitrate assimilation and reduced leaf pigmentation but have no effect on photosynthetic performance or growth. *Plant Physiol* 147(1):115–127.
- Lisec J, Schauer N, Kopka J, Willmitzer L, Fernie AR (2006) Gas chromatography mass spectrometry-based metabolite profiling in plants. *Nat Protoc* 1(1):387–396.
- Kopka J, et al. (2005) GMD@CSB.DB: The Golm Metabolome Database. *Bioinformatics* 21(8):1635–1638.
- Schauer N, et al. (2005) GC-MS libraries for the rapid identification of metabolites in complex biological samples. *FEBS Lett* 579(6):1332–1337.
- Fernie AR, et al. (2011) Recommendations for reporting metabolite data. *Plant Cell* 23(7):2477–2482.
- Tohge T, Fernie AR (2010) Combining genetic diversity, informatics and metabolomics to facilitate annotation of plant gene function. *Nat Protoc* 5(6):1210–1227.

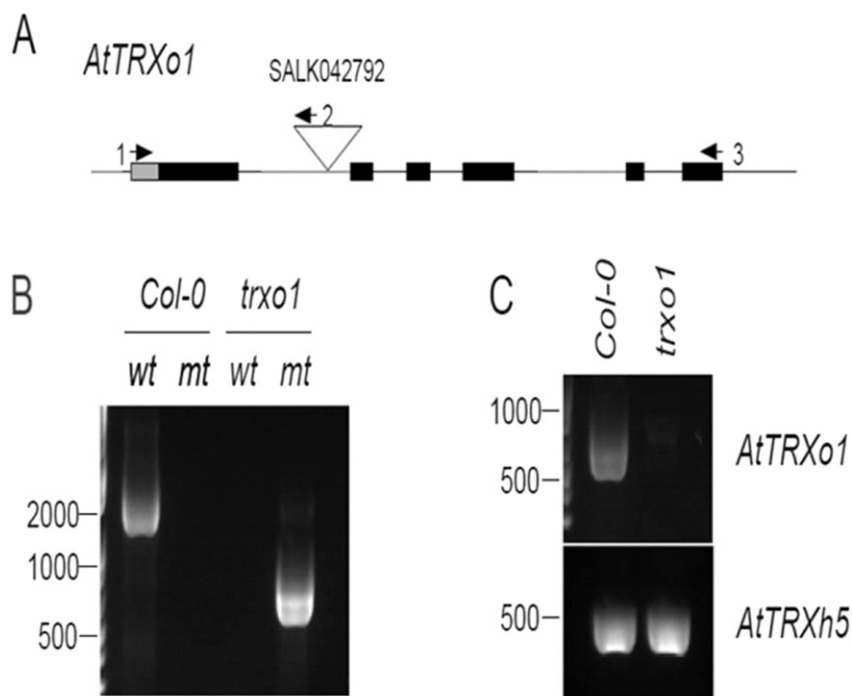

**Fig. S1.** Genetic mapping of the *trxo1* insertion line. (A) T-DNA insertion within the *trxo1* (At2g35010, SALK042792) line was mapped by PCR. The oligonucleotides used are represented with arrows and numbers. Intergenic regions and introns are shown with black lines, and exons are shown with boxes. A gray box represents the putative mitochondrial transit peptide. (B) Genotyping of the *trxo1* homozygous plants. WT copy (*wt*) was amplified using primers 1 (CTCGAGTGATGAAGGAAATTGGTCG) and 3 (CAACACGTTCTTACTAGAACGG). The mutant copy (*mt*) was amplified using primers 1 and 2 (TGGTTCACG-TAGTGGGCCATCG). (C) *AtTRXo1* mRNAs in the WT (*Col-0*) and *trxo1* homozygote mutant line. RT-PCR assays (40 cycles) were performed using *AtTRXo1* gene-specific oligonucleotides. The *AtTRXh5* gene was used as a positive PCR control.

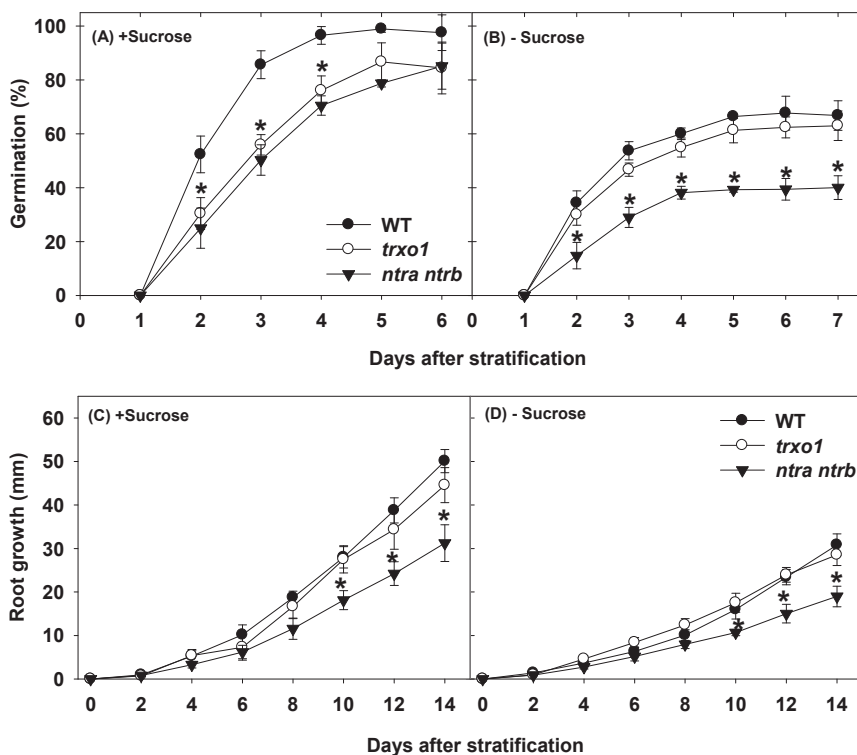

**Fig. S2.** Effect of TRX inactivation on seed germination of *Arabidopsis thaliana* plants. Radicle emergence was used as the criterion of seed germination. Germination tests were performed in a minimum of triplicate experiments using at least 100 seeds for an individual assay. The average germination percentage  $\pm$  SEM of triplicate experiments is shown. Asterisks indicate values significantly different from WT by the Student's *t* test ( $*P < 0.05$ ).

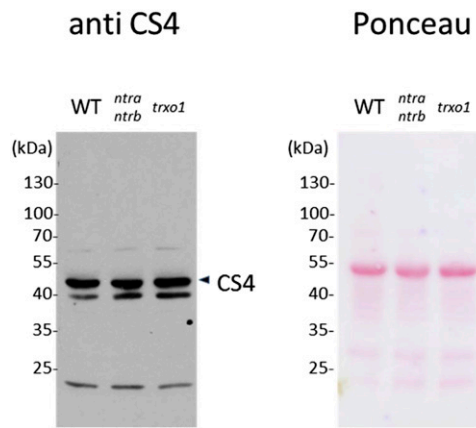

**Fig. S3.** Abundance of CS isoform 4 (CS4) protein. Total proteins were extracted from leaves of *A. thaliana* WT, *ntra ntrb* double mutant, and *trxo1* mutant; separated by 1D SDS/PAGE; and analyzed by Western blot using an anti-CS4 antibody (~50 kDa).

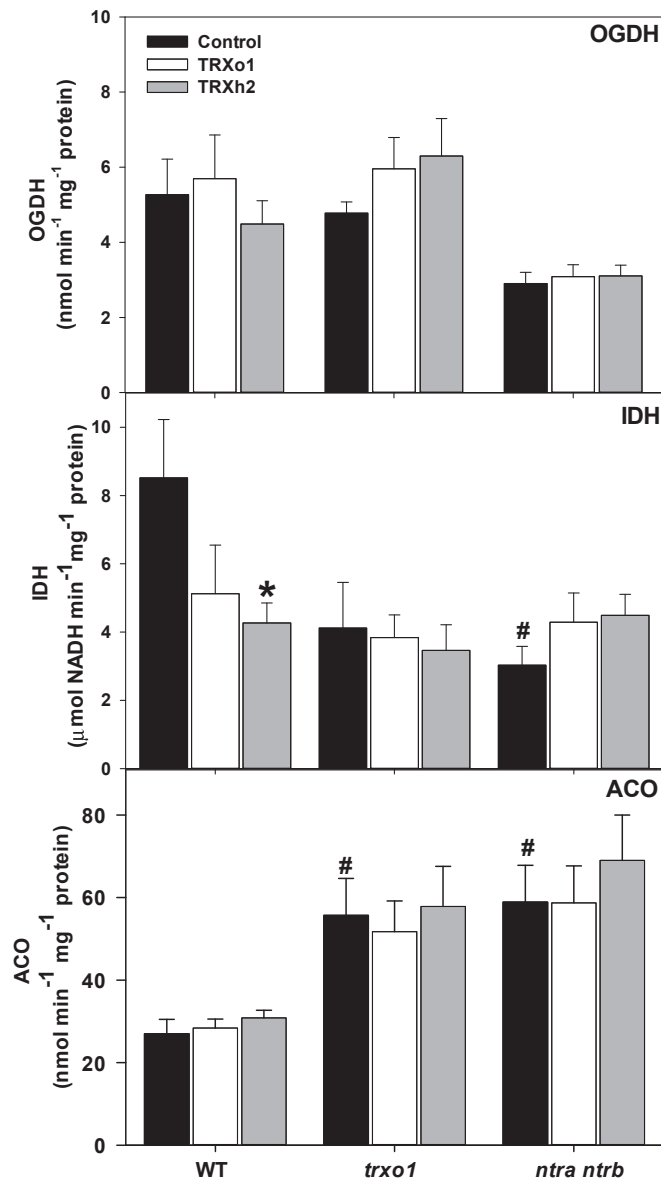

**Fig. S4.** Enzyme activities and protein-based complementation in WT, *trxo1*, and *ntra ntrb* mutants. Oxoglutarate dehydrogenase (OGDH), NAD-IDH, and ACO activities were measured in mitochondrial extracts of WT, *trxo1*, and *ntra ntrb* mutants. These extracts were also used to perform protein-based complementation assays. The extracts were untreated (Control) or treated with TRXo1 (3  $\mu$ g; 180 nM) or TRXh2 (3  $\mu$ g; 210 nM), both reduced by NTRB (7.5  $\mu$ g; 100 nM) and NADPH (100  $\mu$ M). Data presented are mean  $\pm$  SEM ( $n = 5$ ). A number symbol indicates values significantly different from WT by Student's *t* test at 5% ( $\#P < 0.05$ ) and an asterisk indicates values significantly different from the control in the same genotype by the Student's *t* test at 5% ( $*P < 0.05$ ).

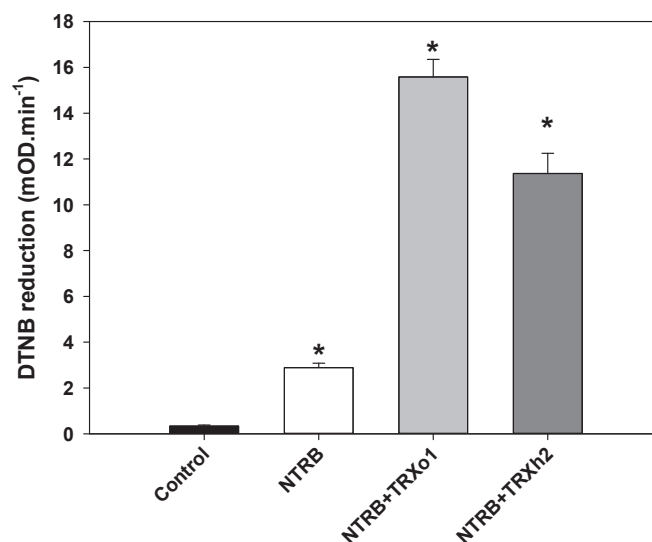

**Fig. S5.** Activity of the TRX system determined with the DTNB reduction assay. TRXo1 (3  $\mu\text{g}$ ; 180 nM) and TRXh2 (3  $\mu\text{g}$ ; 210 nM) were reduced with NTRB (7.5  $\mu\text{g}$ ; 100 nM) and NADPH (100  $\mu\text{M}$ ) at room temperature and then incubated with DTNB (130  $\mu\text{M}$ ). The rate of DTNB reduction was measured at 412 nm. Control values indicate the assay performed without NTRB (Control) or without TRX (NTRB). mOD, mili optical density. Asterisks indicate values significantly different from control by the Student's *t* test ( $P < 0.05$ ).

**Table S1.** Growth phenotype of WT, *trxo1*, and *ntra ntrb* mutants

| Age      | WT              | <i>trxo1</i>                      | <i>ntra ntrb</i>               |
|----------|-----------------|-----------------------------------|--------------------------------|
| 2-wk-old | 120 $\pm$ 14    | <u>44 <math>\pm</math> 2</u>      | <u>28 <math>\pm</math> 0.1</u> |
| 4-wk-old | 729 $\pm$ 41    | <u>604 <math>\pm</math> 48</u>    | <u>484 <math>\pm</math> 60</u> |
| 6-wk-old | 2,553 $\pm$ 328 | <u>3,384 <math>\pm</math> 284</u> | 2,746 $\pm$ 29                 |
| 8-wk-old | 3,638 $\pm$ 264 | 3,743 $\pm$ 570                   | 3,564 $\pm$ 63                 |

The shoot FW (mg) was determined in plants grown in a growth chamber as described in *Material and Methods*. Similar results were observed in at least three independent experiments. Data presented are mean  $\pm$  SEM ( $n = 5$ ). Values set in bold and underlined type were determined by the Student's *t* test to be significantly different ( $P < 0.05$ ) from the WT.

**Table S2.** Enzyme activities in whole-leaf extract of WT, *trxo1* mutant, and *ntra ntrb* double mutant

| Enzymes        | WT             | <i>trxo1</i>                     | <i>ntra ntrb</i> |
|----------------|----------------|----------------------------------|------------------|
| RUBISCO        | 0.45 $\pm$ 0.0 | 0.45 $\pm$ 0.0                   | 0.46 $\pm$ 0.0   |
| NADP-MDH total | 1.85 $\pm$ 0.0 | 1.91 $\pm$ 0.1                   | 2.00 $\pm$ 0.1   |
| AGPase         | 1.26 $\pm$ 0.0 | <u>1.15 <math>\pm</math> 0.0</u> | 1.25 $\pm$ 0.0   |
| NADP-GAPDH     | 0.17 $\pm$ 0.0 | <u>0.11 <math>\pm</math> 0.0</u> | 0.16 $\pm$ 0.0   |

Activities ( $\text{nmol}\cdot\text{min}^{-1}\cdot\text{g}^{-1}\cdot\text{FW}^{-1}$ ) were determined in leaf material harvested at the end of the day from 4-wk-old plants before bolting. Rubisco, ribulose-1,5-biphosphate carboxylase oxygenase. Data presented are mean  $\pm$  SE ( $n = 6$ ). Values set in bold and underlined type were determined by the Student's *t* test to be significantly different ( $P < 0.05$ ) from the WT.

**Table S3. Content of metabolites in WT, *trxo1* mutant, and *ntra ntrb* double mutant**

| Metabolite    | WT         | <i>trxo1</i>      | <i>ntra ntrb</i>  |
|---------------|------------|-------------------|-------------------|
| GC-MS         |            |                   |                   |
| Val           | 1.00 ± 0.1 | 0.86 ± 0.1        | 1.26 ± 0.3        |
| Ile           | 1.00 ± 0.1 | 1.15 ± 0.2        | 1.23 ± 0.1        |
| Fumarate      | 1.00 ± 0.1 | 0.99 ± 0.1        | 1.03 ± 0.1        |
| Urea          | 1.00 ± 0.2 | 0.77 ± 0.1        | 1.14 ± 0.3        |
| Spermidine    | 1.00 ± 0.1 | 1.01 ± 0.1        | 1.15 ± 0.2        |
| Glycolic acid | 1.00 ± 0.1 | 0.83 ± 0.0        | 1.00 ± 0.1        |
| Glyceric acid | 1.00 ± 0.1 | 0.83 ± 0.1        | 0.98 ± 0.0        |
| Raffinose     | 1.00 ± 0.2 | 0.65 ± 0.1        | 1.12 ± 0.2        |
| Sucrose       | 1.00 ± 0.1 | 0.89 ± 0.0        | 1.05 ± 0.0        |
| Gal           | 1.00 ± 0.2 | 0.96 ± 0.2        | 0.96 ± 0.1        |
| Talose        | 1.00 ± 0.1 | 0.89 ± 0.2        | 0.88 ± 0.1        |
| Trehalose     | 1.00 ± 0.2 | 1.06 ± 0.1        | <u>1.80 ± 0.2</u> |
| Myoinositol   | 1.00 ± 0.2 | 0.76 ± 0.1        | 1.43 ± 0.1        |
| LC-MS         |            |                   |                   |
| 4 MTBG        | 1.00 ± 0.3 | 0.79 ± 0.1        | <u>0.32 ± 0.1</u> |
| 3 MSPG        | 1.00 ± 0.2 | <u>0.63 ± 0.0</u> | 0.64 ± 0.3        |
| 4 MSBG        | 1.00 ± 0.1 | <u>0.53 ± 0.2</u> | 0.63 ± 0.3        |
| 5 MSPG        | 1.00 ± 0.1 | <u>0.51 ± 0.2</u> | 0.78 ± 0.2        |
| 7 MSHG        | 1.00 ± 0.2 | <u>0.61 ± 0.2</u> | 1.26 ± 0.3        |
| 8 MSOG        | 1.00 ± 0.2 | 0.66 ± 0.1        | 1.60 ± 0.5        |
| IndoleGLS 1   | 1.00 ± 0.3 | 0.36 ± 0.2        | 0.75 ± 0.3        |
| IndoleGLS 2   | 1.00 ± 0.8 | 0.34 ± 0.3        | 0.43 ± 0.8        |
| Sinapoyl Glu  | 1.00 ± 0.1 | <u>0.21 ± 0.2</u> | <u>0.72 ± 0.2</u> |
| Sinapoyl Mal  | 1.00 ± 0.0 | <u>0.68 ± 0.2</u> | <u>0.68 ± 0.1</u> |
| Kaempferol 1  | 1.00 ± 0.1 | 0.90 ± 0.0        | <u>1.17 ± 0.0</u> |
| Kaempferol 2  | 1.00 ± 0.1 | <u>1.13 ± 0.1</u> | <u>1.36 ± 0.0</u> |
| Kaempferol 3  | 1.00 ± 0.0 | 0.91 ± 0.1        | 0.92 ± 0.1        |
| Anthocyanin   | 1.00 ± 0.7 | 0.35 ± 0.6        | <u>2.19 ± 0.3</u> |

Metabolites were determined at end of the day as described in *Materials and Methods*. The GC-MS data were normalized with the values obtained for ribitol (internal standard) and the FW used for the extraction (~100 mg). The liquid chromatography (LC)-MS data were normalized with the peak area of internal standard (isovitexin) and FW used for the analysis. The data presented are normalized with respect to the mean response calculated for WT plants. Data presented are mean ± SEM ( $n = 6$ ). Values in underlined type indicate values significantly different from WT by the Student's *t* test at 5% ( $P < 0.05$ ). Glucosinolates: 3 MSPG, 3-methylsulfinylpropyl glucosinolate; 4 MSBG, 4-methylsulfinylbutyl glucosinolate; 5 MSPG, 5-methylsulfinylpentyl glucosinolate; 7 MSHG, 7-methylsulfinylheptyl glucosinolate; 8 MSOG, 8-methylsulfinyloctyl glucosinolate; 4 MTBG, 4-methylthiobutyl glucosinolate. Indole glucosinolates: IndoleGLS 1, 1-methoxy-3-indolylmethyl glucosinolate, 1-methoxyindol-3-ylmethylglucosinolate; IndoleGLS 2, indole-3-methylglucosinolate. Phenylpropanoids: Sinapoyl Mal, Sinapoyl (S)-malate; Sinapoyl Glu, Sinapoyl glucoside. Flavonoids: Kaempferol 1, kaempferol 3-O-rhamnoside 7-O-rhamnoside; Kaempferol 2, kaempferol 3-O-glucoside 7-O-rhamnoside; Kaempferol 3, kaempferol 3-O-[2''-O-(rhamnosyl) glucoside] 7-O-rhamnoside; Anthocyanin, cyanidin 3-O-[2''-O-(6'''-O-(sinapoyl) xylosyl) 6'''-O-(p-O-(glucosyl)-p-coumaroyl) glucoside] 5-O-(6''''-O-malonyl) glucoside.

**Table S4. Redistribution of the total  $^{13}\text{C}$ -enrichment in selected metabolites after 4 h of  $^{13}\text{C}$ -labeling in leaves of WT, *trxo1* mutant, and *ntra ntrb* double-mutant *A. thaliana* plants**

| Metabolite                | WT          | <i>trxo1</i>       | <i>ntra ntrb</i>   |
|---------------------------|-------------|--------------------|--------------------|
| $^{13}\text{C}$ -Glc      |             |                    |                    |
| Pyruvate                  | 0.01 ± 0.0  | 0.01 ± 0.0         | 0.02 ± 0.0         |
| Pro                       | 0.05 ± 0.0  | <b>0.02 ± 0.0</b>  | <b>0.01 ± 0.0</b>  |
| Gly                       | 0.19 ± 0.1  | 0.15 ± 0.0         | 0.10 ± 0.0         |
| Fumarate                  | 0.49 ± 0.1  | 0.37 ± 0.1         | 0.48 ± 0.1         |
| Ser                       | 0.05 ± 0.0  | 0.03 ± 0.0         | 0.04 ± 0.0         |
| Ala                       | 0.007 ± 0.0 | 0.007 ± 0.0        | <b>0.014 ± 0.0</b> |
| Malate                    | 0.001 ± 0.0 | <b>0.002 ± 0.0</b> | <b>0.004 ± 0.0</b> |
| Asp                       | 0.01 ± 0.0  | 0.01 ± 0.0         | <b>0.001 ± 0.0</b> |
| Glu                       | 0.10 ± 0.0  | 0.12 ± 0.0         | 0.11 ± 0.0         |
| Succinate                 | 0.002 ± 0.0 | 0.003 ± 0.0        | <b>0.003 ± 0.0</b> |
| Fructose                  | 0.36 ± 0.2  | 0.36 ± 0.1         | 0.53 ± 0.1         |
| Sucrose                   | 5.75 ± 0.7  | 4.88 ± 0.4         | 5.20 ± 0.6         |
| Raffinose                 | 0.45 ± 0.1  | 0.18 ± 0.1         | <b>0.05 ± 0.0</b>  |
| $^{13}\text{C}$ -malate   |             |                    |                    |
| Pyruvate                  | 0.004 ± 0.0 | 0.004 ± 0.0        | 0.01 ± 0.0         |
| Pro                       | 0.01 ± 0.0  | 0.01 ± 0.0         | 0.02 ± 0.0         |
| Fumarate                  | 0.62 ± 0.1  | 0.58 ± 0.1         | 0.57 ± 0.1         |
| Ala                       | 0.002 ± 0.0 | 0.001 ± 0.0        | <b>0.01 ± 0.0</b>  |
| Malate                    | 0.06 ± 0.0  | 0.05 ± 0.0         | 0.07 ± 0.0         |
| Asp                       | 0.05 ± 0.0  | 0.04 ± 0.0         | <b>0.001 ± 0.0</b> |
| Glu                       | 0.12 ± 0.0  | 0.08 ± 0.0         | 0.09 ± 0.0         |
| Succinate                 | 0.002 ± 0.0 | 0.002 ± 0.0        | <b>0.004 ± 0.0</b> |
| $^{13}\text{C}$ -pyruvate |             |                    |                    |
| Pyruvate                  | 0.19 ± 0.1  | 0.20 ± 0.1         | 0.08 ± 0.0         |
| Val                       | 0.92 ± 0.1  | 1.19 ± 0.1         | <b>1.55 ± 0.1</b>  |
| Pro                       | 0.08 ± 0.0  | 0.12 ± 0.0         | 0.11 ± 0.0         |
| Gly                       | 0.18 ± 0.1  | 0.22 ± 0.1         | 0.06 ± 0.0         |
| Fumarate                  | 0.44 ± 0.2  | 0.60 ± 0.1         | 0.59 ± 0.1         |
| Ser                       | 0.06 ± 0.0  | <b>0.01 ± 0.0</b>  | <b>0.02 ± 0.0</b>  |
| Ala                       | 0.04 ± 0.0  | 0.11 ± 0.0         | <b>0.15 ± 0.0</b>  |
| Malate                    | 0.003 ± 0.0 | 0.004 ± 0.0        | 0.003 ± 0.0        |
| Asp                       | 0.01 ± 0.0  | 0.02 ± 0.0         | <b>0.001 ± 0.0</b> |
| Glu                       | 0.48 ± 0.1  | 0.74 ± 0.2         | 0.57 ± 0.1         |
| Succinate                 | 0.02 ± 0.0  | 0.03 ± 0.0         | 0.02 ± 0.0         |
| Sucrose                   | 1.29 ± 0.2  | 1.57 ± 0.2         | 1.20 ± 0.3         |

Fully expanded leaves of 6-wk-old plants were harvested in the middle of the light period and fed via the petiole with [U- $^{13}\text{C}$ ]Glc, [U- $^{13}\text{C}$ ]pyruvate, or [U- $^{13}\text{C}$ ]malate solution. Data presented are mean ± SEM ( $n = 6$ ). Values ( $\mu\text{mol}$  of fractional  $^{13}\text{C}$  enrichment  $\text{g}^{-1}\cdot\text{FW}^{-1}\cdot\text{h}^{-1}$ ) in bold and underline type were determined by the Student's  $t$  test to be significantly different from the WT ( $P < 0.05$ ).

**Table S5. Enzyme activities and chlorophyll content in leaf extract and mitochondria isolated**

| Markers     | Leaf       | Mitochondria      |
|-------------|------------|-------------------|
| PEPc        | 1,238 ± 79 | <b>196 ± 25</b>   |
| Catalase    | 32 ± 2.0   | <b>1.5 ± 0.7</b>  |
| COX         | 120 ± 12   | <b>1,011 ± 80</b> |
| Chlorophyll | 717 ± 8.3  | <b>82 ± 2.0</b>   |

Catalase ( $\mu\text{mol}$  of  $\text{H}_2\text{O}_2$  per  $\text{min}^{-1}\cdot\text{mg}^{-1}$  of protein), COX ( $\text{nmol}\cdot\text{min}^{-1}\cdot\text{mg}^{-1}$  of protein), phosphoenolpyruvate carboxylase (PEPc;  $\text{nmol}\cdot\text{min}^{-1}\cdot\text{mg}^{-1}$  of protein) and total chlorophyll content ( $\text{mg}\cdot\text{mg}^{-1}$  of protein) were used as marker for peroxisome, mitochondria, cytosol, and chloroplast, respectively. These sub-cellular markers were measured in WT, *trxo1* mutant, and *ntra ntrb* double mutant ( $n = 5$ ). The results are the average of the genotypes. Values in bold and underlined type were determined by the Student's  $t$  test to be significantly different from leaf ( $P < 0.05$ ).

## Other Supporting Information Files

[Dataset S1 \(PPT\)](#)

[Dataset S2 \(XLS\)](#)

[Dataset S3 \(XLS\)](#)
